# Supplementary material
Source: PubMed Central journal article supplement (PMC3032279)
Supplement: 0dbc70398fe7960d6b20a0e33f95db6c_figS1-3.pdf [file 0dbc70398fe7960d6b20a0e33f95db6c_figS1-3.pdf]

P04074JAT1A1\_SHEEP/1-1021 1 MGKGVGRDKYEPAAVSEHGDKK-----KAKKERDMDLKKVEVMDDHKLSDLELHRKYGTDLNRGLTARAAEILARDGNALTPPTTPEWVKFCRQLFGGFSMLLWIGAILCFLAYGIAAATEE 121  
P05023JAT1A1\_HUMAN/1-1023 1 MGKGVGRDKYEPAAVSEHGDKK-----KAKKERDMDLKKVEVMDDHKLSDLELHRKYGTDLNRGLTARAAEILARDGNALTPPTTPEWVKFCRQLFGGFSMLLWIGAILCFLAYGIAAATEE 123  
Q8VDN2JAT1A1\_MOUSE/1-1023 1 MGKGVGRDKYEPAAVSEHGDKK-----KAKKERDMDLKKVEVMDDHKLSDLELHRKYGTDLNRGLTARAAEILARDGNALTPPTTPEWVKFCRQLFGGFSMLLWIGAILCFLAYGIRSAATEE 123  
P06685JAT1A1\_RAT/1-1023 1 MGKGVGRDKYEPAAVSEHGDKK-----KAKKERDMDLKKVEVMDDHKLSDLELHRKYGTDLNRGLTARAAEILARDGNALTPPTTPEWVKFCRQLFGGFSMLLWIGAILCFLAYGIRSAATEE 123  
P09572JAT1A1\_CHICK/1-1021 1 MGKGVGRDKYEPAAVSEHGDKK-----KAKKERDMDLKKVEVMDDHKLSDLELHRKYGTDLNRGLTARAAEILARDGNALTPPTTPEWVKFCRQLFGGFSMLLWIGAILCFLAYGIRSAATEE 121  
Q92123JAT1A1\_XENLA/1-1025 1 MGKGVGRDKYEPAAVSEHGDKK-----KAKKERDMDLKKVEVMDDHKLSDLELHRKYGTDLNRGLTARAAEILARDGNALTPPTTPEWVKFCRQLFGGFSMLLWIGAILCFLAYGIRSAATEE 125  
AT1A1\_ZEBRAFISH/1-1028 1 MGRGEGREQYELAAVSEHGDKK-----KAKKERDMDLKKVEVMDDHKLSDLELHRKYGTDLNRGLTARAAEILARDGNALTPPTTPEWVKFCRQLFGGFSMLLWIGAILCFLAYGIRSAATEE 126

P04074JAT1A1\_SHEEP/1-1021 122 EPQNDLLYLGVVLSAVVIITGCFSSYYQEAQSSKIMESFKNMVPQALVIRNGEKMSINAEVAVVVDLVEVKGDDIPADLRISANGCKVONSLLTGESSEPQTRSPPDFNENPLETRNIAFFSTNC 247  
P05023JAT1A1\_HUMAN/1-1023 122 EPQNDLLYLGVVLSAVVIITGCFSSYYQEAQSSKIMESFKNMVPQALVIRNGEKMSINAEVAVVVDLVEVKGDDIPADLRISANGCKVONSLLTGESSEPQTRSPPDFNENPLETRNIAFFSTNC 249  
Q8VDN2JAT1A1\_MOUSE/1-1023 124 EPPNDLLYLGVVLSAVVIITGCFSSYYQEAQSSKIMESFKNMVPQALVIRNGEKMSINAEVAVVVDLVEVKGDDIPADLRISANGCKVONSLLTGESSEPQTRSPPDFNENPLETRNIAFFSTNC 249  
P06685JAT1A1\_RAT/1-1023 124 EPPNDLLYLGVVLSAVVIITGCFSSYYQEAQSSKIMESFKNMVPQALVIRNGEKMSINAEVAVVVDLVEVKGDDIPADLRISANGCKVONSLLTGESSEPQTRSPPDFNENPLETRNIAFFSTNC 249  
P09572JAT1A1\_CHICK/1-1021 122 EPPNDLLYLGVVLSAVVIITGCFSSYYQEAQSSKIMESFKNMVPQALVIRNGEKMSINAEVAVVVDLVEVKGDDIPADLRISANGCKVONSLLTGESSEPQTRSPPDFNENPLETRNIAFFSTNC 247  
Q92123JAT1A1\_XENLA/1-1025 126 EPQNDLLYLGVVLSAVVIITGCFSSYYQEAQSSKIMESFKNMVPQALVIRNGEKMSINAEVAVVVDLVEVKGDDIPADLRISANGCKVONSLLTGESSEPQTRSPPDFNENPLETRNIAFFSTNC 251  
AT1A1\_ZEBRAFISH/1-1028 127 EPPNDLLYLGVVLSAVVIITGCFSSYYQEAQSSKIMESFKNMVPQALVIRNGEKMSINAEVAVVVDLVEVKGDDIPADLRISANGCKVONSLLTGESSEPQTRSPPDFNENPLETRNIAFFSTNC 252

P04074JAT1A1\_SHEEP/1-1021 248 VEGTARGIVVYTGDRTVMGRIATLASGLEGGQTPIAAEIEHFHITGVAVFLGVSFFILSLILEYTWLEAVIFLIGIVANVPEGLLATVTVCLTLAKRMARKNCLVKNLEAVETLGSSTIC 373  
P05023JAT1A1\_HUMAN/1-1023 250 VEGTARGIVVYTGDRTVMGRIATLASGLEGGQTPIAAEIEHFHITGVAVFLGVSFFILSLILEYTWLEAVIFLIGIVANVPEGLLATVTVCLTLAKRMARKNCLVKNLEAVETLGSSTIC 375  
Q8VDN2JAT1A1\_MOUSE/1-1023 250 VEGTARGIVVYTGDRTVMGRIATLASGLEGGQTPIAAEIEHFHITGVAVFLGVSFFILSLILEYTWLEAVIFLIGIVANVPEGLLATVTVCLTLAKRMARKNCLVKNLEAVETLGSSTIC 373  
P06685JAT1A1\_RAT/1-1023 250 VEGTARGIVVYTGDRTVMGRIATLASGLEGGQTPIAAEIEHFHITGVAVFLGVSFFILSLILEYTWLEAVIFLIGIVANVPEGLLATVTVCLTLAKRMARKNCLVKNLEAVETLGSSTIC 375  
P09572JAT1A1\_CHICK/1-1021 248 VEGTARGIVVYTGDRTVMGRIATLASGLEGGQTPIAAEIEHFHITGVAVFLGVSFFILSLILEYTWLEAVIFLIGIVANVPEGLLATVTVCLTLAKRMARKNCLVKNLEAVETLGSSTIC 373  
Q92123JAT1A1\_XENLA/1-1025 252 VEGTARGIVVYTGDRTVMGRIATLASGLEGGQTPIAAEIEHFHITGVAVFLGVSFFILSLILEYTWLEAVIFLIGIVANVPEGLLATVTVCLTLAKRMARKNCLVKNLEAVETLGSSTIC 377  
AT1A1\_ZEBRAFISH/1-1028 253 VEGTARGIVVYTGDRTVMGRIATLASGLEGGQTPIAAEIEHFHITGVAVFLGVSFFILSLILEYTWLEAVIFLIGIVANVPEGLLATVTVCLTLAKRMARKNCLVKNLEAVETLGSSTIC 378

P04074JAT1A1\_SHEEP/1-1021 374 DKTGTLTQNRMTVAHMFWDNQIHEADTTENOSGVSFDTSATWLALSRVAGLGNRAVFAQNDLPLIKRRAVAGDASESALLKCIIEVCGSVKEMREKRVAKIVEIPNSTNKYQLSIHKNNANA--G 497  
P05023JAT1A1\_HUMAN/1-1023 376 DKTGTLTQNRMTVAHMFWDNQIHEADTTENOSGVSFDTSATWLALSRVAGLGNRAVFAQNDLPLIKRRAVAGDASESALLKCIIEVCGSVKEMREKRVAKIVEIPNSTNKYQLSIHKNNANA--G 499  
Q8VDN2JAT1A1\_MOUSE/1-1023 376 DKTGTLTQNRMTVAHMFWDNQIHEADTTENOSGVSFDTSATWLALSRVAGLGNRAVFAQNDLPLIKRRAVAGDASESALLKCIIEVCGSVKEMREKRVAKIVEIPNSTNKYQLSIHKNNANA--G 499  
P06685JAT1A1\_RAT/1-1023 376 DKTGTLTQNRMTVAHMFWDNQIHEADTTENOSGVSFDTSATWLALSRVAGLGNRAVFAQNDLPLIKRRAVAGDASESALLKCIIEVCGSVKEMREKRVAKIVEIPNSTNKYQLSIHKNNANA--G 499  
P09572JAT1A1\_CHICK/1-1021 374 DKTGTLTQNRMTVAHMFWDNQIHEADTTENOSGVSFDTSATWLALSRVAGLGNRAVFAQNDLPLIKRRAVAGDASESALLKCIIEVCGSVKEMREKRVAKIVEIPNSTNKYQLSIHKNNANA--G 497  
Q92123JAT1A1\_XENLA/1-1025 379 DKTGTLTQNRMTVAHMFWDNQIHEADTTENOSGVSFDTSATWLALSRVAGLGNRAVFAQNDLPLIKRRAVAGDASESALLKCIIEVCGSVKEMREKRVAKIVEIPNSTNKYQLSIHKNNANA--G 501  
AT1A1\_ZEBRAFISH/1-1028 379 DKTGTLTQNRMTVAHMFWDNQIHEADTTENOSGVSFDTSATWLALSRVAGLGNRAVFAQNDLPLIKRRAVAGDASESALLKCIIEVCGSVKEMREKRVAKIVEIPNSTNKYQLSIHKNNANA--G 504

P04074JAT1A1\_SHEEP/1-1021 498 EPRHLLVMKGAPELIDRCSLILIHGKEQPLDEELKDAFQNAYLELGGGERVLFCHLPLDEQFPEGFQFDTDVNFVFDNLFCVGLISMIDPPRAAVPDAVGGKRSAGIKVIMVTDGHPITAK 623  
P05023JAT1A1\_HUMAN/1-1023 500 EPRHLLVMKGAPELIDRCSLILIHGKEQPLDEELKDAFQNAYLELGGGERVLFCHLPLDEQFPEGFQFDTDVNFVFDNLFCVGLISMIDPPRAAVPDAVGGKRSAGIKVIMVTDGHPITAK 625  
Q8VDN2JAT1A1\_MOUSE/1-1023 500 EPRHLLVMKGAPELIDRCSLILIHGKEQPLDEELKDAFQNAYLELGGGERVLFCHLPLDEQFPEGFQFDTDVNFVFDNLFCVGLISMIDPPRAAVPDAVGGKRSAGIKVIMVTDGHPITAK 625  
P06685JAT1A1\_RAT/1-1023 500 EPRHLLVMKGAPELIDRCSLILIHGKEQPLDEELKDAFQNAYLELGGGERVLFCHLPLDEQFPEGFQFDTDVNFVFDNLFCVGLISMIDPPRAAVPDAVGGKRSAGIKVIMVTDGHPITAK 625  
P09572JAT1A1\_CHICK/1-1021 498 EPRHLLVMKGAPELIDRCSLILIHGKEQPLDEELKDAFQNAYLELGGGERVLFCHLPLDEQFPEGFQFDTDVNFVFDNLFCVGLISMIDPPRAAVPDAVGGKRSAGIKVIMVTDGHPITAK 623  
Q92123JAT1A1\_XENLA/1-1025 502 ESRYLVMKGAPELIDRCSLILIHGKEQPLDEELKDAFQNAYLELGGGERVLFCHLPLDEQFPEGFQFDTDVNFVFDNLFCVGLISMIDPPRAAVPDAVGGKRSAGIKVIMVTDGHPITAK 627  
AT1A1\_ZEBRAFISH/1-1028 505 ESRHLLVMKGAPELIDRCSLILIHGKEQPLDEELKDAFQNAYLELGGGERVLFCHLPLDEQFPEGFQFDTDVNFVFDNLFCVGLISMIDPPRAAVPDAVGGKRSAGIKVIMVTDGHPITAK 630

P04074JAT1A1\_SHEEP/1-1021 624 AIAKGVYIISEGNETVEDIAARLNIPVQVNPDRDAKACVHGSGLDKDMSSEQLDDLLKRYHTEIVFARTSPQOKLIVEGQROGAVAVTGGVNDSPALKKADIGVAMGIVGSDVSKQAADMILL 749  
P05023JAT1A1\_HUMAN/1-1023 626 AIAKGVYIISEGNETVEDIAARLNIPVQVNPDRDAKACVHGSGLDKDMSSEQLDDLLKRYHTEIVFARTSPQOKLIVEGQROGAVAVTGGVNDSPALKKADIGVAMGIVGSDVSKQAADMILL 751  
Q8VDN2JAT1A1\_MOUSE/1-1023 626 AIAKGVYIISEGNETVEDIAARLNIPVQVNPDRDAKACVHGSGLDKDMSSEQLDDLLKRYHTEIVFARTSPQOKLIVEGQROGAVAVTGGVNDSPALKKADIGVAMGIVGSDVSKQAADMILL 751  
P06685JAT1A1\_RAT/1-1023 626 AIAKGVYIISEGNETVEDIAARLNIPVQVNPDRDAKACVHGSGLDKDMSSEQLDDLLKRYHTEIVFARTSPQOKLIVEGQROGAVAVTGGVNDSPALKKADIGVAMGIVGSDVSKQAADMILL 751  
P09572JAT1A1\_CHICK/1-1021 624 AIAKGVYIISEGNETVEDIAARLNIPVQVNPDRDAKACVHGSGLDKDMSSEQLDDLLKRYHTEIVFARTSPQOKLIVEGQROGAVAVTGGVNDSPALKKADIGVAMGIVGSDVSKQAADMILL 749  
Q92123JAT1A1\_XENLA/1-1025 628 AIAKGVYIISEGNETVEDIAARLNIPVQVNPDRDAKACVHGSGLDKDMSSEQLDDLLKRYHTEIVFARTSPQOKLIVEGQROGAVAVTGGVNDSPALKKADIGVAMGIVGSDVSKQAADMILL 753  
AT1A1\_ZEBRAFISH/1-1028 631 AIAKGVYIISEGNETVEDIAARLNIPVQVNPDRDAKACVHGSGLDKDMSSEQLDDLLKRYHTEIVFARTSPQOKLIVEGQROGAVAVTGGVNDSPALKKADIGVAMGIVGSDVSKQAADMILL 756

P04074JAT1A1\_SHEEP/1-1021 750 DDNFASIVTGVVEEGLIFDNLKKSIAYTLLTSNIPETPFLIFIANIPLPLGTVTILCIDLGTDMVPAISLAYEQAESDIMKQRPNNPKTDKLVNERLISMAYGGIGMIALGGFFTYEVLIAENG 875  
P05023JAT1A1\_HUMAN/1-1023 752 DDNFASIVTGVVEEGLIFDNLKKSIAYTLLTSNIPETPFLIFIANIPLPLGTVTILCIDLGTDMVPAISLAYEQAESDIMKQRPNNPKTDKLVNERLISMAYGGIGMIALGGFFTYEVLIAENG 877  
Q8VDN2JAT1A1\_MOUSE/1-1023 752 DDNFASIVTGVVEEGLIFDNLKKSIAYTLLTSNIPETPFLIFIANIPLPLGTVTILCIDLGTDMVPAISLAYEQAESDIMKQRPNNPKTDKLVNERLISMAYGGIGMIALGGFFTYEVLIAENG 877  
P06685JAT1A1\_RAT/1-1023 750 DDNFASIVTGVVEEGLIFDNLKKSIAYTLLTSNIPETPFLIFIANIPLPLGTVTILCIDLGTDMVPAISLAYEQAESDIMKQRPNNPKTDKLVNERLISMAYGGIGMIALGGFFTYEVLIAENG 875  
P09572JAT1A1\_CHICK/1-1021 750 DDNFASIVTGVVEEGLIFDNLKKSIAYTLLTSNIPETPFLIFIANIPLPLGTCTILCIDLGTDMVPAISLAYEQAESDIMKQRPNNPKTDKLVNERLISMAYGGIGMIALGGFFTYEVLIAENG 877  
Q92123JAT1A1\_XENLA/1-1025 754 DDNFASIVTGVVEEGLIFDNLKKSIAYTLLTSNIPETPFLIFIANIPLPLGTVTILCIDLGTDMVPAISLAYEQAESDIMKQRPNNPKTDKLVNERLISMAYGGIGMIALGGFFTYEVLIAENG 879  
AT1A1\_ZEBRAFISH/1-1028 757 DDNFASIVTGVVEEGLIFDNLKKSIAYTLLTSNIPETPFLIFIANIPLPLGTVTILCIDLGTDMVPAISLAYEQAESDIMKQRPNNPKTDKLVNERLISMAYGGIGMIALGGFFTYEVLIAENG 882

P04074JAT1A1\_SHEEP/1-1021 876 FLPLHLLGLRVTWDDRWINDVEDSYGQWQYEQRKIVEFTCHTAFVSVVVQWADLVICKTRRNSVFQGMKKNILIFGLFEETALAAFSLYCPGMGVALRMPYLPKPTWWFCAPFYSLLIFVYDE 1001  
P05023JAT1A1\_HUMAN/1-1023 878 FLPLHLLGLRVTWDDRWINDVEDSYGQWQYEQRKIVEFTCHTAFVSVVVQWADLVICKTRRNSVFQGMKKNILIFGLFEETALAAFSLYCPGMGVALRMPYLPKPTWWFCAPFYSLLIFVYDE 1003  
Q8VDN2JAT1A1\_MOUSE/1-1023 878 FLPLHLLGLRVTWDDRWINDVEDSYGQWQYEQRKIVEFTCHTAFVSVVVQWADLVICKTRRNSVFQGMKKNILIFGLFEETALAAFSLYCPGMGVALRMPYLPKPTWWFCAPFYSLLIFVYDE 1003  
P06685JAT1A1\_RAT/1-1023 878 FLPLHLLGLRVTWDDRWINDVEDSYGQWQYEQRKIVEFTCHTAFVSVVVQWADLVICKTRRNSVFQGMKKNILIFGLFEETALAAFSLYCPGMGVALRMPYLPKPTWWFCAPFYSLLIFVYDE 1003  
P09572JAT1A1\_CHICK/1-1021 876 FLPLHLLGLRVTWDDRWINDVEDSYGQWQYEQRKIVEFTCHTAFVSVVVQWADLVICKTRRNSVFQGMKKNILIFGLFEETALAAFSLYCPGMGVALRMPYLPKPTWWFCAPFYSLLIFVYDE 1001  
Q92123JAT1A1\_XENLA/1-1025 880 FLPLHLLGLRVTWDDRWINDVEDSYGQWQYEQRKIVEFTCHTAFVSVVVQWADLVICKTRRNSVFQGMKKNILIFGLFEETALAAFSLYCPGMGVALRMPYLPKPTWWFCAPFYSLLIFVYDE 1005  
AT1A1\_ZEBRAFISH/1-1028 883 FLPLHLLGLRVTWDDRWINDVEDSYGQWQYEQRKIVEFTCHTAFVSVVVQWADLVICKTRRNSVFQGMKKNILIFGLFEETALAAFSLYCPGMGVALRMPYLPKPTWWFCAPFYSLLIFVYDE 1008

P04074JAT1A1\_SHEEP/1-1021 1002 VRKLIIRRRPGGWVEKETYY 1021  
P05023JAT1A1\_HUMAN/1-1023 1004 VRKLIIRRRPGGWVEKETYY 1023  
Q8VDN2JAT1A1\_MOUSE/1-1023 1004 VRKLIIRRRPGGWVEKETYY 1023  
P06685JAT1A1\_RAT/1-1023 1004 VRKLIIRRRPGGWVEKETYY 1023  
P09572JAT1A1\_CHICK/1-1021 1002 VRKLIIRRRPGGWVEKETYY 1021  
Q92123JAT1A1\_XENLA/1-1025 1006 VRKLIIRRRPGGWVEKETYY 1025  
AT1A1\_ZEBRAFISH/1-1028 1009 VRKLIIRRRPGGWVEKETYY 1028

P34971|ADRB1\_MOUSE/1-466 1 MGAGALALGASPCNLSSAAPLPDGAATAARLLVLA... 125  
P18090|ADRB1\_RAT/1-466 1 MGAGALALGASPCNLSSAAPLPDGAATAARLLVLA... 125  
P08588|ADRB1\_HUMAN/1-477 1 MGAGVLLVGLASPCNLSSAAPLPDGAATAARLLVLA... 125  
O42574|ADRB1\_XENLA/1-385 1 MGDGWPMECRN... 102  
ADRB1\_ZEBRAFISH/1-390 1 MGDGLPSVNYN... 95  
P10608|ADRB2\_RAT/1-418 1 ME...PHGKDSDF... 100  
P18762|ADRB2\_MOUSE/1-418 1 MG...RHNSDSDF... 100  
P07550|ADRB2\_HUMAN/1-413 1 MG...QPGNGSAF... 100  
ADRB2\_CHICKEN/1-397 1 MGIVAGTELRGGN... 97  
ADRB2\_XENOPUS/1-406 1 MD... 92  
ADRB2\_ZEBRAFISH/1-409 1 ME-ENTLITENTSLYMN... 107

P34971|ADRB1\_MOUSE/1-466 126 YGFFCELWTSVDLVCVTAS IETLCVIALDRYLAITS... 249  
P18090|ADRB1\_RAT/1-466 126 YGFFCELWTSVDLVCVTAS IETLCVIALDRYLAITL... 249  
P08588|ADRB1\_HUMAN/1-477 126 YGFFCELWTSVDLVCVTAS IETLCVIALDRYLAIT... 249  
O42574|ADRB1\_XENLA/1-385 103 YGSIPECFWTSVDLVCVTAS IETLCVIALDRYIAI... 227  
ADRB1\_ZEBRAFISH/1-390 96 YGSIPECFWTSVDLVCVTAS IETLCVIALDRYIAI... 217  
P10608|ADRB2\_RAT/1-418 101 FGNFWCEFWTSIDLVCVTAS IETLCVIAVDRYVAI... 224  
P18762|ADRB2\_MOUSE/1-418 101 FGNFWCEFWTSIDLVCVTAS IETLCVIAVDRYVAI... 224  
P07550|ADRB2\_HUMAN/1-413 101 FGNFWCEFWTSIDLVCVTAS IETLCVIAVDRYVAI... 224  
ADRB2\_CHICKEN/1-397 98 FGNFWCEFWTSIDLVCVTAS IETLCVIAVDRYVAI... 221  
ADRB2\_XENOPUS/1-406 93 FNNFWCEFWTSIDLVCVTAS IETLCVIAVDRYVAI... 216  
ADRB2\_ZEBRAFISH/1-409 108 FGNFWCEFWTATIDLVCVTAS IETLCVIALDRYIAI... 231

P34971|ADRB1\_MOUSE/1-466 250 EAQKQVKKIDS CERRFLGGPARPPSPPEPS... 361  
P18090|ADRB1\_RAT/1-466 250 EAQKQVKKIDS CERRFLGGPARPPSPPEPS... 361  
P08588|ADRB1\_HUMAN/1-477 250 EAQKQVKKIDS CERRFLGGPARPPSPPEPS... 372  
O42574|ADRB1\_XENLA/1-385 228 EAQKQMKKIDKCEGRFSSHSV... 320  
ADRB1\_ZEBRAFISH/1-390 218 EAKQLNKNKCEGRFYNNH... 309  
P10608|ADRB2\_RAT/1-418 225 VAKRLQKIDKSEGRFHAQNLQV... 321  
P18762|ADRB2\_MOUSE/1-418 225 VAKRLQKIDKSEGRFHAQNLQV... 321  
P07550|ADRB2\_HUMAN/1-413 225 EAKRLQKIDKSEGRFVQNLQV... 321  
ADRB2\_CHICKEN/1-397 222 VAKQLQKIDKSEGRFHIQNKED... 315  
ADRB2\_XENOPUS/1-406 217 EAKQLKIDKSEGRFHQNPQ... 309  
ADRB2\_ZEBRAFISH/1-409 232 EARRLQKIDRIGRIRIQSL... 324

P34971|ADRB1\_MOUSE/1-466 362 NP I I YCRS P D F R K A F Q R L L C C A R R A C R R R A A H G D R P R A S G L L A R A G P P P S P G A P S D D D D D D A G T P P A R L L E P W T G C N G G T T V D S D S L D E P G R G F S S E S K V 466  
P18090|ADRB1\_RAT/1-466 362 NP I I YCRS P D F R K A F Q R L L C C A R R A C R R R A A H G D R P R A S G L L A R A G P P P S P G A P S D D D D D D A G A T P P A R L L E P W A G C N G G T T V D S D S L D E P G R G F S S E S K V 466  
P08588|ADRB1\_HUMAN/1-477 373 NP I I YCRS P D F R K A F Q R L L C C A R R A R R R R H T G D R P R A S G L L A R A G P P P S P G A S D D D D D V G A T P P A R L L E P W A G C N G G A A A D S D S L D E C R P G E A S E S K V 477  
O42574|ADRB1\_XENLA/1-385 321 NP I I YCRS P D F R K A F K R L L C C P K A D R H L H T T G E L S R Y S G G F V N S L D T N A L G M C S E C N G V R T S L D S L D E P G R G F S S E S K V 385  
ADRB1\_ZEBRAFISH/1-390 310 NP I I YCRS P D F R K A F K R L L C C P R A D R R L L H V S C L S R C T G G F G N S M E Q S M L G T W S D C N G A D S S D C S L E R N G R M S H S E S Q 390  
P10608|ADRB2\_RAT/1-418 322 NP L I YCRS P D F R I A F Q E L L C L R R S S S K T Y G N G Y S S N S N G R T D Y T G E Q S A W L G Q E K E N E L L C E E A P G M E G F V N C O G T V P S L S I D S O G R N C T N D S P L 418  
P18762|ADRB2\_MOUSE/1-418 322 NP L I YCRS P D F R I A F Q E L L C L R R S S S K T Y G N G Y S S N S N G R T D Y T G E P N T C L Q G E R E Q E L L C E D P P G M E G F V N C O G T V P S L S V D S O G R N C T N D S P L 418  
P07550|ADRB2\_HUMAN/1-413 322 NP L I YCRS P D F R I A F Q E L L C L R R S S L K A Y G N G Y S S N G N T G E Q S G H V E Q E K E N K L C E D L P G T E D F V H G O T V P S D N I D S O G R N C T N D S L L 413  
ADRB2\_CHICKEN/1-397 316 NP L I YCRS P D F R Y A F Q E L L C L R R S A L K M Y A N G Y S N S N G R S D Y N E D N G Y P L A P D K A C E L L C E G S F P H P E D F L H C K G T V P S G 397  
ADRB2\_XENOPUS/1-406 310 NP L I YCRS P D F R Y T F Q E L L C L R K P A S K D V A N G Y P Q S N G N S I Y M E D T D P S P Y S K G R A C E V L F K E E K T P N D S L S N C E G T R L D F S L D P L G K N H N T H D C L L 406  
ADRB2\_ZEBRAFISH/1-409 325 NP L I YCRS P E F R C A F Q E I L C W R P S H L R S T R S K K K Y L Y S H S K W V H T K T T R P R E P S P A C E T E I G A E C L T A G T K N G N G N Y K T V T I 409



**Supplemental Figures: Sequence alignments.**

S1: AT1A1: the  $\alpha 1\beta 1$  subunit of Na/K ATPase; Extensive similarity is found in these proteins. Residues implicated in binding to the prototypic cardiac glycoside OUA (27) are highly conserved across the seven species presented here. S2: Adrenergic receptor;  $\beta 1$  receptors (no shading);  $\beta 2$  receptors (yellow shading). S3: Calcium Channel. Purple shading indicates amino acid conservation  $> 70\%$  at each position; a black triangle or bar above a particular position, together with grey shading, denotes known drug binding residues or domains.
